# Supplementary material
Source: PubMed Central journal article supplement (PMC4995899)
Supplement: IAI.01554-15_zii999091798so1.pdf [file IAI.01554-15_zii999091798so1.pdf]

1 Table S1. Bacterial and yeast strains used in this study.

| Strains                 | Phenotype or Description                                                                                                                                                                                                             | References |
|-------------------------|--------------------------------------------------------------------------------------------------------------------------------------------------------------------------------------------------------------------------------------|------------|
| <i>C. burnetii</i>      |                                                                                                                                                                                                                                      |            |
| RSA439                  | Phase II, Clone 4 (NMII)                                                                                                                                                                                                             | (18)       |
| RSA439 MK24-33          | Cbu0041::Tn, Cm <sup>r</sup>                                                                                                                                                                                                         | (18)       |
| RSA439 MK25-95          | <i>dotB</i> ::Tn, Cm <sup>r</sup>                                                                                                                                                                                                    | This study |
| RSA439 MK21             | <i>icmX</i> ::Tn, Cm <sup>r</sup>                                                                                                                                                                                                    | (18)       |
| RSA439 MK22             | Intergenic Cbu0179-Cbu0180::Tn, Cm <sup>r</sup>                                                                                                                                                                                      | This study |
| RSA439 MK21-1           | <i>enhC</i> ::Tn, Cm <sup>r</sup>                                                                                                                                                                                                    | This study |
| RSA 439 MK2 EVS101-CirA | Cbu0041::Tn, Cm <sup>r</sup> , pEVS101-CirA                                                                                                                                                                                          | This study |
| <i>E. coli</i>          |                                                                                                                                                                                                                                      |            |
| DH5 $\alpha$            | <i>F</i> '( $\Phi$ 80d $\Delta$ ( <i>lacZ</i> )M15), <i>recA1</i> , <i>endA1</i> , <i>gyrA96</i> , <i>thi1</i> , <i>hsdR17</i> ( <i>rk-mk</i> +), <i>supE44</i> , <i>relA1</i> , <i>deoR</i> , $\Delta$ ( <i>lacZYA-argF</i> ), U169 | Stratagene |
| <i>S. cerevisiae</i>    |                                                                                                                                                                                                                                      |            |
| W303                    | <i>MATa ura3-1 leu2-3,112 his3-11,15 trp1-1 ade2-1 cad-100 rad5-535</i>                                                                                                                                                              | (18)       |
| W303 pYesNTA-CirA       | W303, pYesNTA-CirA                                                                                                                                                                                                                   | (18)       |

2  
3  
4  
5  
6  
7  
8  
9  
10  
11  
12  
13  
14  
15  
16  
17  
18  
19

20 Table S2. Plasmids used in the study.

| Plasmid                            | Description                                                                                                     | References or Source |
|------------------------------------|-----------------------------------------------------------------------------------------------------------------|----------------------|
| <b><i>C. burnetii</i> plasmids</b> |                                                                                                                 |                      |
| pKM225                             | pMW1650, <i>com1p</i> -TnA7, <i>groESp</i> -mCherry, <i>com1p</i> -cat, Cm <sup>R</sup>                         | (18)                 |
| pKM244                             | pJB908a, <i>groESp</i> -mCherry, <i>com1p</i> -cat, Cm <sup>R</sup> , Amp <sup>R</sup>                          | (18)                 |
| pEVS101                            | pJB908a, <i>groESp</i> -mCherry, <i>com1p</i> -cat, Cm <sup>R</sup> , Amp <sup>R</sup> , p1169-Kan <sup>R</sup> | This study           |
| pEVS101-CirA                       | pEVS101-CirA                                                                                                    | This study           |
| <b>Ectopic expression plasmids</b> |                                                                                                                 |                      |
| pRK5-myc-RhoA WT                   | pRK5-myc::RhoA, <i>carb</i> <sup>f</sup>                                                                        | Addgene 12962        |
| pRK5-myc-RhoA CA                   | pRK5-myc::RhoA Q63L, <i>carb</i> <sup>f</sup>                                                                   | Addgene 12964        |
| pRK5-myc-RhoA DN                   | pRK5-myc::RhoA T19N, <i>carb</i> <sup>f</sup>                                                                   | Addgene 12963        |
| pRK5-myc-Rac1 WT                   | pRK5-myc::Rac1, <i>carb</i> <sup>f</sup>                                                                        | Addgene 12985        |
| pEGFP-C1                           | C-terminal fusion to EGFP, <i>kan</i> <sup>f</sup>                                                              | Clontech             |
| pEGFPC1-CirA                       | pEGFP-C1::Cbu0041                                                                                               | (18)                 |
| <b>Yeast expression plasmids</b>   |                                                                                                                 |                      |
| p415ADH                            | pGal, <i>carb</i> <sup>R</sup> , Leu2                                                                           | (27)                 |
| P415ADH-Rho1                       | P415ADH:: <i>rho1</i>                                                                                           | This study           |
| P415ADH-MRP2                       | P415ADH:: <i>mrp2</i>                                                                                           | This study           |
| P415ADH-Met16                      | P415ADH:: <i>met16</i>                                                                                          | This study           |
| P415ADH-Nut2                       | P415ADH:: <i>nut2</i>                                                                                           | This study           |
| P415ADH-Jip5                       | P415ADH:: <i>jip5</i>                                                                                           | This study           |
| pYESNTA                            | pGal, Carb <sup>R</sup> , Ura                                                                                   | (18)                 |
| pYESNTA-CirA                       | pYESNTA::CirA                                                                                                   | (18)                 |

21

22

23

24

25

26

27

28

29

30

31

32

33

34

35

36

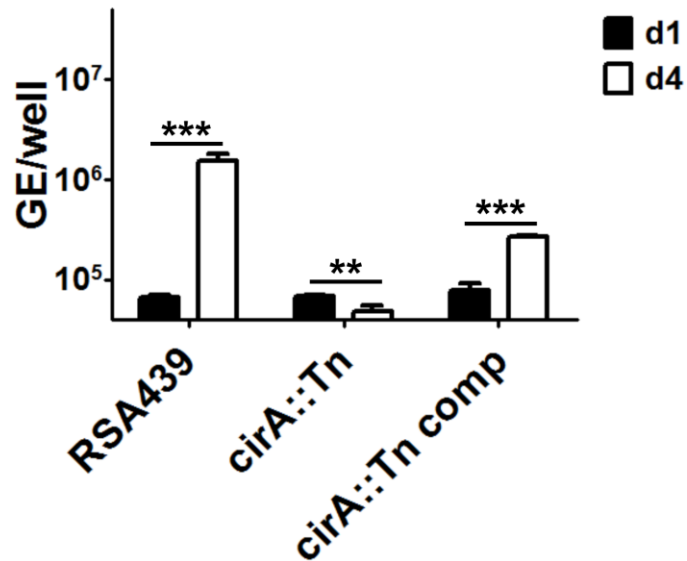

37

38 **Figure S1.** Replication of wild-type RSA439, *cirA::Tn*, and the complemented mutant in J774A.1  
 39 macrophages infected with an MOI of 50. Genome equivalents (GE) were determined at 1 d and  
 40 4 d using quantitative PCR. Data are representative of two independent experiments.

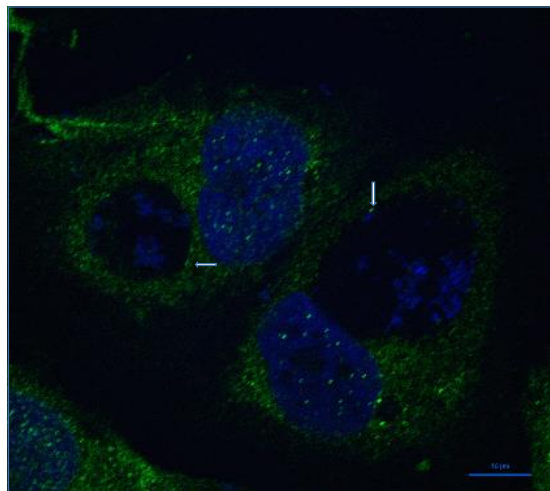

41

42 **Figure S2.** Figure A.2. Localization of endogenous RhoA during *C. burnetii* infection. Vero  
 43 cells were infected at an MOI of 500 with RSA439 for 5 days and then seeded onto coverslips at  
 44 a density of  $1 \times 10^5$ /mL. 24 hours later coverslips were washed and fixed with 3% formaldehyde

45 for 10 minutes followed by aldehyde quenching using 50mM ammonium acetate for 10 minutes.  
46 Blocking was performed using 0.02% Saponin plus 10% normal horse serum. Anti-RhoA  
47 polyclonal rabbit antibody was diluted 1:50 (Pierce) and incubated on the coverslip for 1 hr.  
48 After washing the coverslips were incubated with goat anti-rabbit Alexa Fluor 488 (Molecular  
49 probe) diluted 1:150 for 1 hr. After washing the coverslips were stained with Hoechst 33258  
50 (Invitrogen) for 10 minutes and then mounted using MOWIOL. Large green puncta localized  
51 next to individual *Coxiella* were observed frequently (vertical arrow) and on CCV (horizontal  
52 arrow).

53

54

55 **Movie S1.** Time-lapse video of HeLa cells transiently transfected with EGFP-CirA. Images were  
56 captured every 1 m for 30 m.

57

58 **Movie S2.** Time-lapse video of HeLa cells transiently transfected with EGFP. Images were  
59 captured every 1 m for 30 m.
